# Supplementary material for: Multiple instance learning to predict immune checkpoint blockade efficacy using neoantigen candidates
Source: PubMed Central journal article supplement — iScience. 2023 Sep 22;26(11):108014. doi: 10.1016/j.isci.2023.108014 (PMC10641489; doi:10.1016/j.isci.2023.108014), 2023-09-22
Supplement: mmc1.pdf [file mmc1.pdf]

iScience, Volume 26

## **Supplemental information**

### **Multiple instance learning to predict immune checkpoint blockade efficacy using neoantigen candidates**

**Franziska Lang, Patrick Sorn, Barbara Schrörs, David Weber, Stefan Kramer, Ugur Sahin, and Martin Löwer**

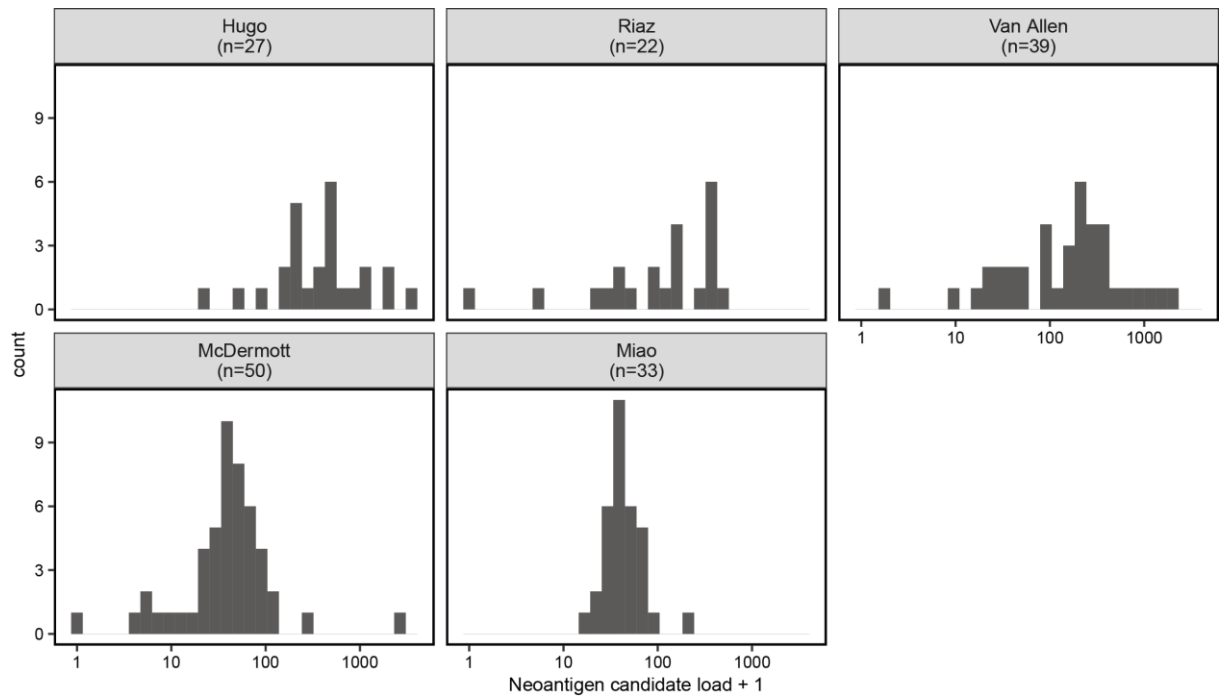

**Figure S1: The distribution of the neoantigen candidate load from SNVs for each individual ICB cohort investigated in this study, related to Figure 2.**

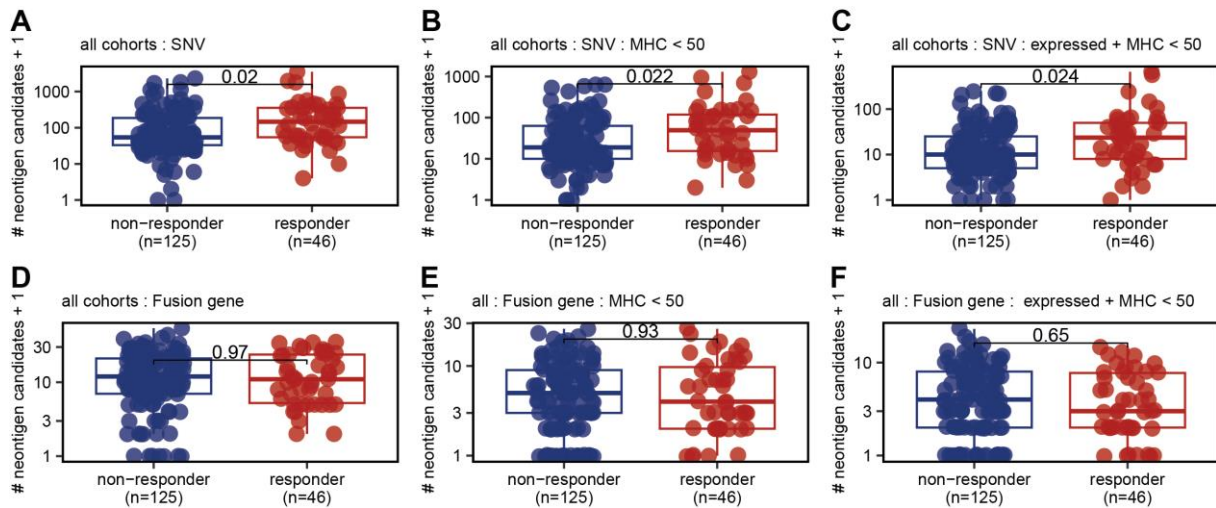

**Figure S2: Comparison of the neoantigen candidate load between responders and non-responders to ICB therapy, related to Figure 3. (A-C)** The SNV-derived neoantigen candidate burden was compared between responder and non-responder in a combined dataset of all ICB cohorts based on (A) all predicted neoantigen candidates, (B) candidates with MHC-I or MHC-II binding affinity < 50 nM and (C) expressed candidates with MHC-I or MHC-II binding affinity < 50 nM. (D-F) The fusion gene-derived neoantigen candidate burden was compared between responder and non-responder in a combined dataset of all ICB cohorts based on (D) all predicted neoantigen candidates, (E) candidates with MHC-I or MHC-II binding affinity < 50 nM and (F) expressed candidates with MHC-I or MHC-II binding affinity < 50 nM. Statistical testing was performed with Wilcoxon signed ranked test. P-values were corrected with multiple testing correction using the Benjamini Hochberg method. Statistical tests resulting in p-values < 0.05 after multiple testing correction were considered as significant.

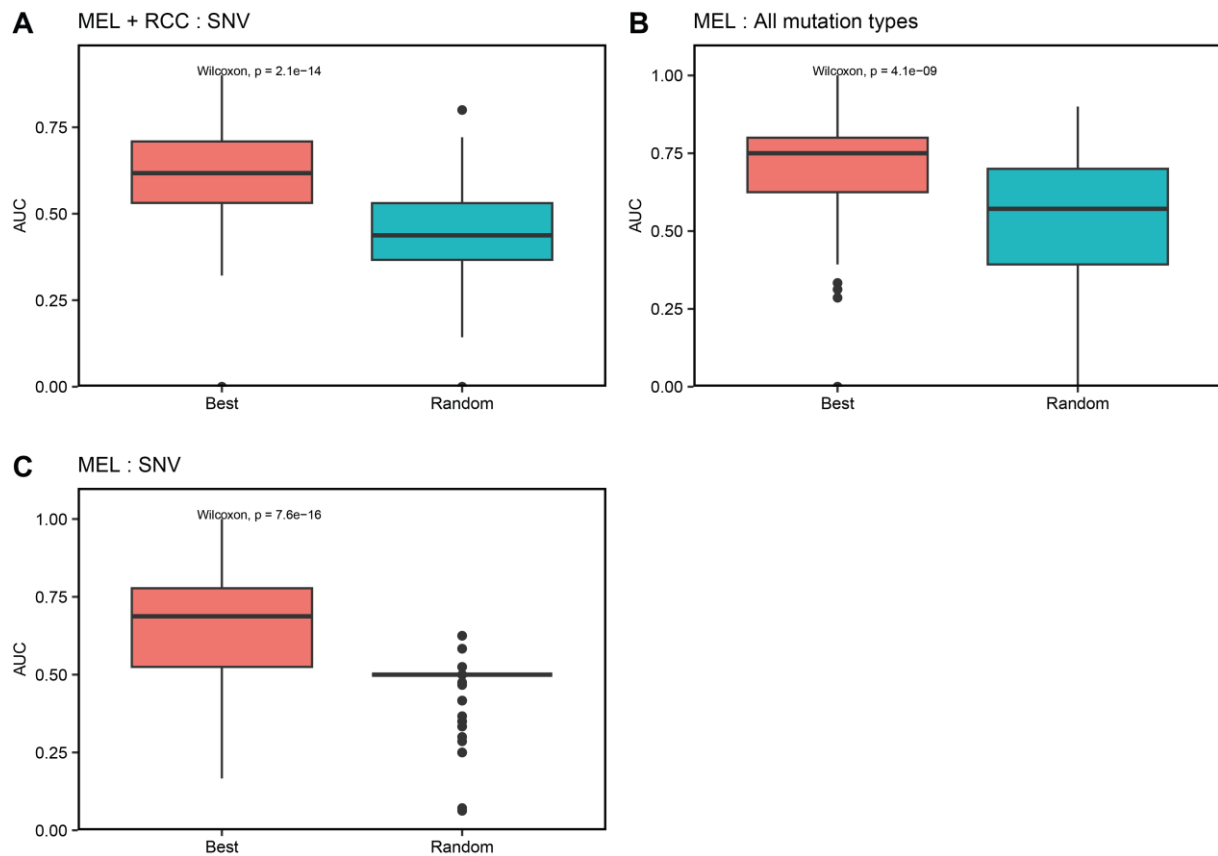

**Figure S3: Performance of MILES on randomized datasets, related to Figure 4. (A-C)** The optimal hyperparameter sets were used to train and evaluate the performance of MILES on randomized datasets of **(A)** all SNV-derived neoantigen candidates from MEL+ RCC cohort, of **(B)** all neoantigen candidates from MEL cohort and of **(C)** all SNV-derived neoantigen candidates from MEL cohort. Randomized refers to the randomization of neoantigen candidates across patients while keeping the original number of neoantigen candidates per patient.

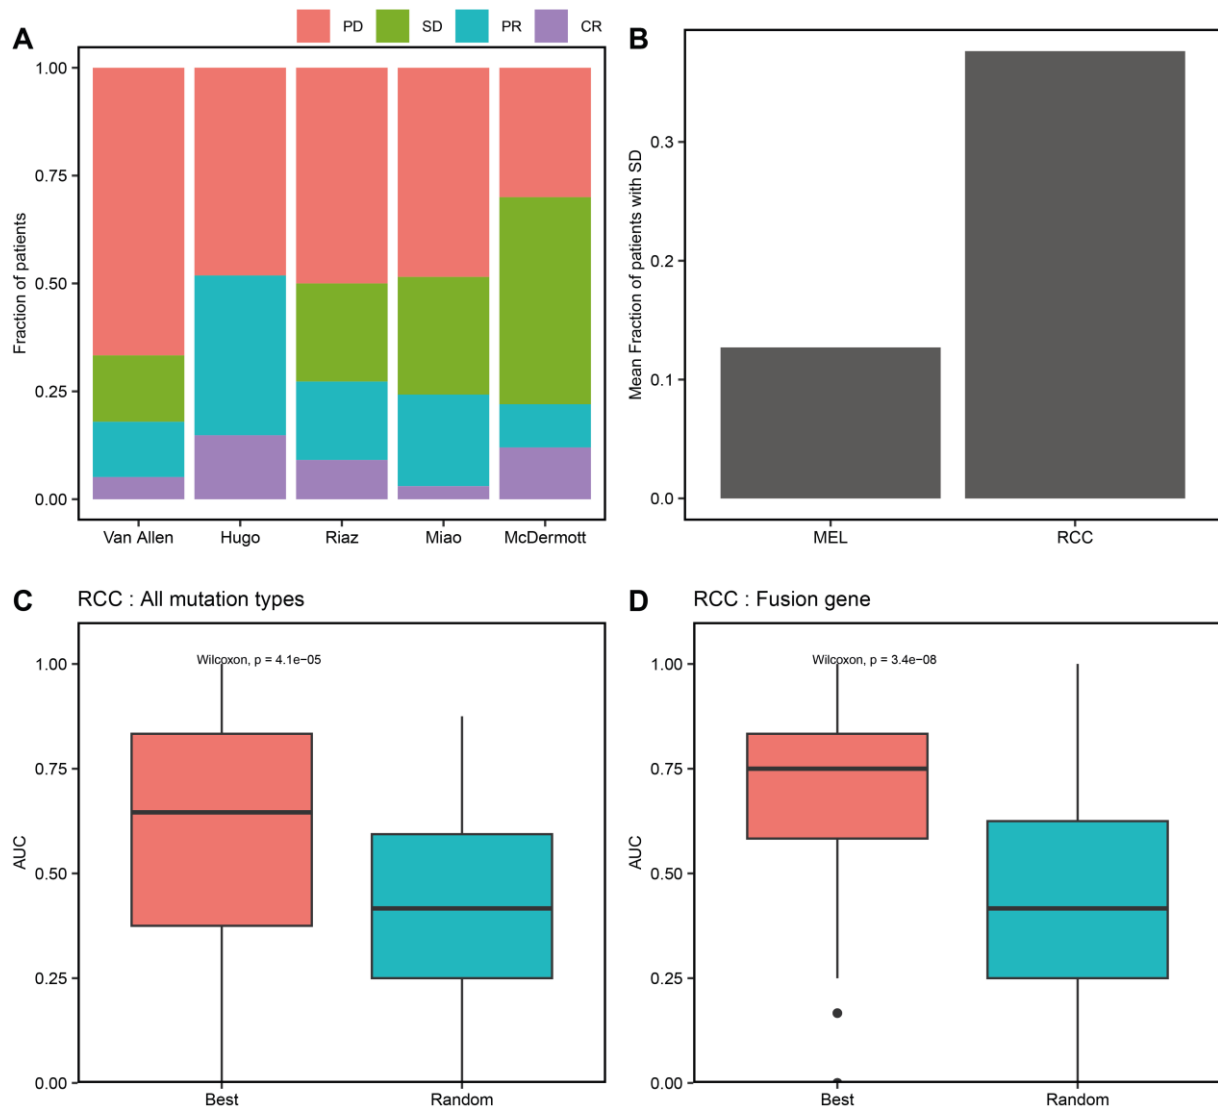

**Figure S4: MILES on a dataset excluding patients with stable disease, related to Figure 4. (A)** Distribution of response categories within the individual cohorts. PD: progressive disease, SD: stable disease, PR: partial response, CR: complete response. **(B)** Fraction of patients with stable disease in the melanoma (MEL) and renal cell carcinoma cohort. **(C-D)** The optimal hyper parameter set were used to train and evaluate the performance of MILES on a randomized dataset without patients with stable disease for the RCC cohort of **(C)** neoantigen candidates from all mutation types and of **(D)** fusion gene-derived neoantigen candidates. Randomized refers to the randomization of neoantigen candidates across patients while keeping the original number of neoantigen candidates per patient in the respective dataset.

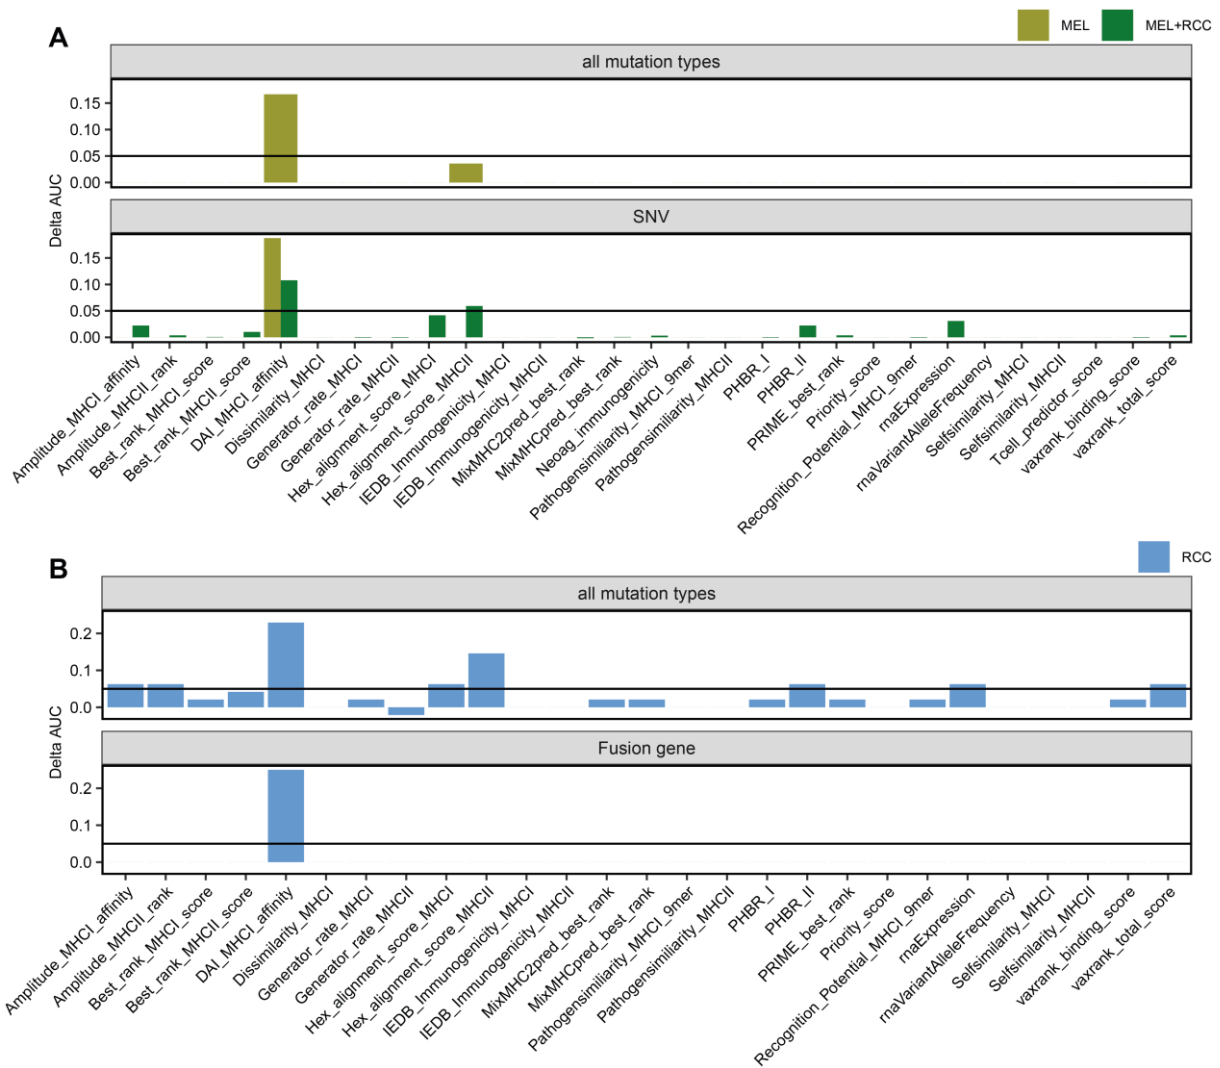

**Figure S5: Feature importance analysis, related to Figure 4:** To estimate the importance of each neoantigen feature, the nested CV approach was 50x repeated for the best hyperparameter setting on a dataset in which the neoantigen feature of interest was permuted. Feature importance was approximated for approaches with median AUROC > 0.6 by the delta AUROC of learning method on the original data and the learning method on the data with permuted feature. **(A)** Feature importance for MILES on neoantigen candidates from all RCC and MEL or MEL-only cohorts. **(B)** Feature importance for MILES on neoantigen candidates from renal cell carcinoma cohorts, excluding patients with stable disease
